# Supplementary material
Source: Springer Nature journal article supplement (https://www.springermedizin.de/resource/supplementary/12967_2009_351_MOESM2_ESM.pdf/9576282)

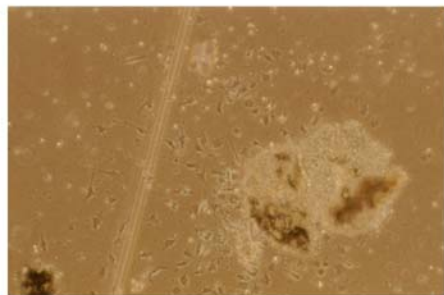

12 days

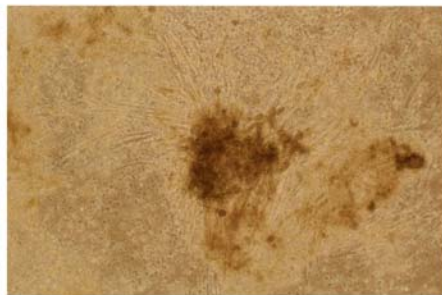

20 days

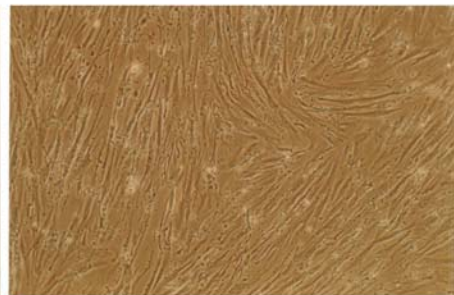

30 days

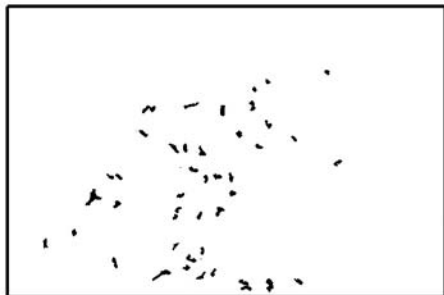

n = 43

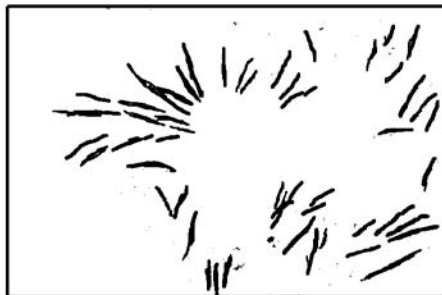

n = 94

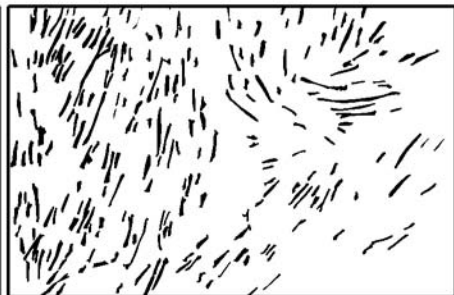

n = 230

Supplement: MOESM2 [file 9576282]
